# Supplementary material for: Meta-Analysis of Organic Fertilization Effects on Soil Bacterial Diversity and Community Composition in Agroecosystems
Source: Plants (Basel). 2023 Nov 8;12(22):3801. doi: 10.3390/plants12223801 (PMC10675672; doi:10.3390/plants12223801)
Supplement: Supplementary file 1 [file plants-12-03801-s001.zip › Supplementary Dataset.xlsx]

## Sheet: dataset0130
observation	Author	Tittle	Location	Latitude	Longitude	MAT	MAP	Land use type	crop_detail	initial Soil pH	initial SOC	initial TN	soil clay content	Fertilizer regime	Fertilizer regime_details	organic fertilizer input rate	Duration	depth	Changes in soil pH	pH_var	SOC	SOC_var	TN	TN_var	TP	TP_var	AN	AN_var	AP	AP_var	AK	AK_var	MBC	MBC_var	Shannon	Shannon_var	Richness	Richness_var	Betadiversity	Betadiversity_var	Community structure	Community structure_var	Method	Proteobacteria	Proteobacteria_var	Acidobacteria	Acidobacteria_var	Actinobacteria	Actinobacteria_var
1	Yu et al	Microbial biomass and community composition in a Luvisol soil as influenced by long-term land use and fertilization	China	41.5333	123.383	7.5	700	upland	soybean–corn–corn	6.7	22.1	0.8		OF	Compost		18	0-20					0.1021	0.0038	0.0405	0.0071	0.3796	0.0053	0.2752	0.0204	0.1219	0.0061	0.4236	0.0013	0.0166	0.0039	0.0488	0.0037
2	Yu et al		China	41.5333	123.383	7.5	700	upland	soybean–corn–corn	6.7	22.1	0.8		COF	NPK+compost	60	18	0-20					0.2465	0.0039	0.2918	0.0061	1.2051	0.0052	2.378	0.0204	0.4495	0.0061	0.1431	0.0011	0.0585	0.004	0.1823	0.0037
3	Zhu et al	Effects of reduced inorganic fertilization and rice straw recovery on soil enzyme activities and bacterial community in double-rice paddy soils	China	28.1383	113.2	17.1	1500	paddy	rice	5.2	17.6	1.99		COF	NPK+crop residue	6.75	9	0-20	-0.06	0.0002	0.0844	0.0029	0.0567	0.0019	0.2545	0.0106			0.8934	0.1066	0.4914	0.0184	0.6033	0.0173	-0.0062	0.0001			0.193598	0.153744	0.401847	0.0423363	NMDS			0.1008	0.0123	-0.3363	0.0205
4	Zhao et al	Effect of Different Straw Return Modes on Soil Bacterial Community, Enzyme Activities and Organic Carbon Fractions	China	34.6	108.867	12.9	527	upland	maize–wheat	8.2	11.32	0.68		OF	crop residue	25.8	8	0-20	-0.16	0.0003	0.2448	0.0029	0.1781	0.0039											0.0164	0.004	0.0721	0.0037								-0.0361	0.0573	0	0.0186
5	Yu et al	Responses of paddy soil bacterial community assembly to different long-term fertilizations in southeast China	China	28.6167	113.333	17.2	1701	paddy	rice	6.6	20.1	2.05		COF	NPK+crop residue	4.2	34	0-10	-0.37	0.0003	0.1514	0.0029	0.324	0.0038					1.6358	0.0204	0.8314	0.0061			-0.0082	0.004	-0.0507	0.0037	-1.17507	0.0665046	0.504643	0.0854123	NMDS
6	Ye et al		China	28.2556	116.925	17.6	1800	upland	peanut				41.2	COF	NPK+crop residue	2.77	27	0-20	0.17	0.0001	0.1514	0.0004	0.2792	0.001					0.6739	0.0204	0.7434	0.0061	0.7089	0.0253										0.1823	0.0078	0.0706	0.0123	0.1563	0.0204
7	Ye et al		China	28.2556	116.925	17.6	1800	upland	peanut				41.2	COF	NPK+crop residue	5.37	27	0-20	0.2	0	0.2256	0.0019	0.3292	0.0009					0.7195	0.0204	0.8927	0.0061	0.8156	0.0295										0.499	0.0078	0.3526	0.0123	0.2445	0.0204
8	Ye et al		China	28.2556	116.925	17.6	1800	upland	peanut				41.2	COF	NPK+crop residue	1.11	27	0-20	0.21	0	0.1723	0.0021	0.3292	0.0004					0.7954	0.0204	0.8837	0.0061	0.844	0.03										0.2017	0.0078	-0.0331	0.0123	0.0597	0.0204
9	Ye et al		China	28.2556	116.925	17.6	1800	upland	peanut				41.2	COF	NPK+manure	0.98	27	0-20	0.62	0	0.3556	0.0009	0.3651	0.0009					3.3963	0.0204	0.7018	0.0033	0.7354	0.0031										0.6325	0.0078	-0.2583	0.0123	0.5705	0.0204
10	Yang et al	Dynamics of Bacterial Communities in a 30-Year Fertilized Paddy Field under Different Organic–Inorganic Fertilization Strategies	China	28.1167	112.3	16.8	1553	paddy	rice	6.85	17.04	2.01	28.6	COF	NPK+manure		30	0-20	-0.08	0	0.4152	0.0015	0.4008	0.0007			0.641	0.0053							-0.0015	0.0002	0.0197	0.0013	1.23755	0.231064	0.853579	0.172182	RDA	0.1167	0.0132	0.1159	0.0559	0.2451	0.0101
11	Yang et al		China	28.1167	112.3	16.8	1553	paddy	rice	6.85	17.04	2.01	28.6	COF	NPK+manure		30	0-20	-0.09	0	0.5266	0.0016	0.4901	0.0004			0.6448	0.0052							-0.031	0.0004	-0.058	0.0016	1.38534	0.0908467	1.13946	0.109812	RDA	-0.0601	0.0062	0.3856	0.0167	0.1485	0.0352
12	Yang et al	Wheat Straw Return Influences Nitrogen-Cycling and Pathogen Associated Soil Microbiota in a Wheat–Soybean Rotation System	China	35.45	116.583	14.3	700	upland	wheat-soybean					OF	crop residue	5	2	0-20																					0.0625595	0.00872038	-0.064095	0.00493769	PCoA	0.0066	0.0047	-0.0414	0.0074	-0.0104	0.0123
13	Yang et al		China	35.45	116.583	14.3	700	upland	wheat-soybean					OF	crop residue	5	3	0-20																					0.136076	0.0220156	-0.034581	0.0104025	PCoA	0.0839	0.0047	-0.0203	0.0074	0	0.0123
14	Yang et al		China	34.2833	117.283	14.7	840	upland	wheat-soybean					OF	crop residue	5	2	0-20																					-0.41172	0.015246	0.154655	0.00713926	PCoA	-0.0391	0.0047	0.0509	0.0074	0	0.0123
15	Yang et al		China	34.2833	117.283	14.7	840	upland	wheat-soybean					OF	crop residue	5	3	0-20																					0.0897448	0.0155455	-0.0539517	0.00793615	PCoA	0.0784	0.0047	-0.0417	0.0074	-0.0303	0.0123
16	Yang et al		China	33.6333	117.083	15.1	875	upland	wheat-soybean					OF	crop residue	5	2	0-20																					0.156311	0.0171502	-0.0435666	0.00770727	PCoA	0.1037	0.0047	-0.195	0.0074	0.0677	0.0123
17	Yang et al		China	33.6333	117.083	15.1	875	upland	wheat-soybean					OF	crop residue	5	3	0-20																					0.301155	0.0134974	-0.0362368	0.00758708	PCoA	0.0209	0.0047	0.0502	0.0074	-0.129	0.0123
18	Wang et al	Succession of Composition and Function of Soil Bacterial Communities During Key Rice Growth Stages	China	37.5333	105.033	9.6	200	upland	maize–wheat	8.59	2.77		20.01	OF	Manure	3.26	17	0-20	-0.12	0.0001	0.4001	0.0186					0.2942	0.0063	1.1587	0.0462	-0.1496	0.0036			-0.0219	0.002	-0.0064	0.0019	-0.333641	0.124331	1.29725	0.0414094	PCA	0.1211	0.0805	-0.2157	0.2863	-0.0287	0.015
19	Wang et al		China	31.65	119.467	15.3	1063	paddy	wheat-rice					COF	NPK+manure	6	10	0-20	-0.32	0	0.2473	0.0014	0.2195	0.0001	0.5423	0.0007	0.2686	0.0034	1.4554	0.0064	0.0491	0.0002			0.0056	0	0.0178	0.0004	-0.431024	0.0246539	0.776233	0.0208739	RDA
20	Wang et al		China	31.65	119.467	15.3	1063	paddy	wheat-rice					COF	NPK+crop residue		10	0-20	-0.47	0.0003	0.1844	0.0015	0.1637	0.0007	0.3365	0.0049	0.1613	0.0017	1.0006	0.0108	-0.0033	0.003			0.0111	0	0.0195	0.0008	0.142777	0.0815261	0.935209	0.0218968	RDA
21	Liu YR et al	Long-term fertiliser (organic and inorganic) input effects on soil microbiological characteristics in hydromorphic paddy soils in China	China	28.5667	115.933	17.5	1800	paddy	rice	6.5	14.8	1.36		COF	NPK+manure	9.8	29	0-20															1.0799	0.0023	-0.1324	0.0029	-0.3185	0.0033
22	Liu YR et al		China	28.5667	115.933	17.5	1800	paddy	rice	6.5	14.8	1.36		COF	NPK+manure	16.3	29	0-20															1.1275	0.0027	-0.0917	0.0036	-0.2007	0.0046
23	Liu YR et al		China	28.5667	115.933	17.5	1800	paddy	rice	6.5	14.8	1.36		COF	NPK+manure	22.8	29	0-20															1.1995	0.0021	-0.0398	0.0019	-0.0465	0.0029
24	Li WT et al	Bacterial community succession in paddy soil depending on rice fertilization	China	28.2583	116.925	17.6	1800	paddy	rice	4.5	3.3	0.43		COF	NPK+manure+crop residue	0.833	9	0-20			0.2663	0.0032	0.3008	0.0015															-0.202407	0.264346	-0.0201837	0.079506	NMDS	-0.1705	0.0078	-0.1336	0.0123	-0.5878	0.0204
25	Li WT et al		China	28.2583	116.925	17.6	1800	paddy	rice	4.5	3.3	0.43		COF	NPK+manure+crop residue	0.833	15	0-20	-0.1	0	0.298	0.0015	0.3331	0.001	0.5108	0.0028	0.2191	0.0107	1.7346	0.0095									-0.395003	0.177556	-0.0888861	0.0899971	NMDS	0.0722	0.0078	-0.5466	0.0123	0.0645	0.0204
26	Li WT et al		China	28.2583	116.925	17.6	1800	paddy	rice	4.5	3.3	0.43		COF	NPK+manure+crop residue	0.833	25	0-20	-0.2	0.0003	0.3141	0.0026	0.1542	0.0019	0.7073	0.0014	0.2283	0.008	1.6881	0.007									0.0746752	0.0827662	-0.138341	0.0425237	NMDS	0.0217	0.0078	-0.2317	0.0123	0.1924	0.0204
27	Li PF et al	Responses of microbial communities to a gradient of pig manure amendment in red paddy soils	China	28.2289	116.883	17.6	1750	paddy	rice					OF	Compost	1.4	4	0-20	0.04	0.0001	-0.0338	0.0035	-0.0039	0.0094	-0.0124	0.0232	-0.1131	0.0042	0.0276	0.0339	-0.0313	0.0033							-0.347242	0.200602	-0.11087	0.0719775	NMDS	-0.0117	0.0014	0.1213	0.0217	-0.8472	0.5254
28	Li PF et al		China	28.2289	116.883	17.6	1750	paddy	rice					OF	Compost	2.8	4	0-20	0.2	0.0007	0.0435	0.0036	0.0749	0.0092	0.306	0.0219	0.0212	0.0037	0.1505	0.026	0	0.0019							-0.31441	0.140536	0.0453648	0.0607923	NMDS	0.071	0.0009	0.0626	0.0249	-1.058	0.5136
29	Li PF et al		China	28.2289	116.883	17.6	1750	paddy	rice					OF	Compost	5.6	4	0-20	0.47	0.0006	0.0222	0.0038	0.0382	0.0085	0.2784	0.0179	-0.0606	0.0035	0.2477	0.0348	-0.0472	0.0036							-0.262464	0.0972667	0.189643	0.0508311	NMDS	0.0995	0.001	-0.0602	0.0207	-0.7151	0.3604
30	Li PF et al		China	28.2289	116.883	17.6	1750	paddy	rice					OF	Compost	11.2	4	0-20	0.79	0.0005	0.1502	0.0035	0.1413	0.0084	0.636	0.0147	0.0212	0.0037	0.1901	0.0245	-0.0313	0.001							-0.234156	0.13159	0.513822	0.0405033	NMDS	0.0889	0.001	-0.1915	0.0129	-0.8958	0.3283
31	Li PF et al		China	28.2289	116.883	17.6	1750	paddy	rice					OF	Compost	22.4	4	0-20	1.01	0.0003	0.1922	0.0053	0.1712	0.0098	0.9138	0.0133	0.0521	0.0041	0.5315	0.0232	0.2444	0.0047							0.118393	0.140398	0.812674	0.0348297	NMDS	0.0926	0.0019	-0.3895	0.0159	-1.4026	0.3427
32	Li PF et al		China	28.2289	116.883	17.6	1750	paddy	rice					OF	Compost	44.8	4	0-20	1.17	0.0003	0.1739	0.0051	0.1712	0.01	0.9286	0.0146	-0.0326	0.0047	0.6993	0.0254	0.4602	0.0173							0.408126	0.178085	0.732395	0.0519707	NMDS	0.0492	0.0012	-0.5549	0.0111	-0.5237	0.6758
33	Hao MM et al	Shifts in microbial community and carbon sequestration in farmland soil under long-term conservation tillage and straw returning	China	35.6333	116.033	13	697	upland	maize–wheat	7.02		1.2		OF	crop residue		15	0-15	0.01	0.0003	0.1719	0.0029	0.2076	0.0038									0.197	0.0121										0.0257	0.0021	0.0561	0.0047	-0.1892	0.0088
34	Guo Z et al	Effects of long-term fertilization on soil organic carbon mineralization and microbial community structure	China	26.4833	106.65	15.3	1071	paddy	rice					OF	Manure	61.1	22	0-20	-0.14	0.0011	0.4915	0.0045	0.166	0.019									0.6302	0.013					-0.263919	0.0719603	0.476335	0.0316394	PCA	0.0126	0.0451	0.1985	0.0387	-0.0714	0.0196
35	Guo Z et al		China	26.4833	106.65	15.3	1071	paddy	rice					COF	NPK+manure	61.1	22	0-20	0.36	0.0015	0.4045	0.005	0.2855	0.0118									1.0253	0.0131					-0.768472	0.231325	0.402509	0.0873436	PCA	-0.047	0.0315	0.1239	0.0303	0	0.0253
36	Chen JH et al	Effect of long-term manure slurry application on the occurrence of antibiotic resistance genes in arable purple soil (entisol)	China	31.2667	105.467	17.3	826	upland	maize–wheat					OF	Manure	8.51	13	0-5	-0.11	0	0.6715	0.0024	0.6766	0.0026											-0.1107	0.001	-0.1327	0.0041	0.304753	0.102946	1.96866	0.0239879	PCoA
37	Chen JH et al		China	31.2667	105.467	17.3	826	upland	maize–wheat					COF	NPK+manure	3.42	13	0-5	-0.17	0.0001	0.4933	0.0022	0.5335	0.0016											-0.0747	0.0007	-0.0898	0.0033	1.89036	0.140228	0.758156	0.155201	PCoA
38	Celestina C et al	A single application of fertiliser or manure to a cropping field has limited long-term effects on soil microbial communities	Australia	-37.6878	142.912	13.3	601	paddy	rice	5.5	24			OF	Manure	20	3	0-20																	0	0.0015	-0.0078	0.0014	-0.139967	0.0843055	0.00521044	0.0393826	PCoA	-0.0182	0.0029	-0.076	0.0046	0.212	0.0077
39	Du Y et al	Nitrogen fertilizer is a key factor effecting the soil chemical and microbial communities in a Mollisol	China	43.7833	123.333	4.8	570	upland	Maize	7.12	22.8	1.39		OF	crop residue	2.5	32	0-15	0.08	0.0006	-0.0614	0.0403	0.1273	0.0194	0.0982	0.0239			-0.0639	0.0186	-0.0435	0.0003												-0.0846	0.0078	0.1054	0.0123	-0.4053	0.0204
40	Du Y et al		China	43.7833	123.333	4.8	570	upland	Maize	7.12	22.8	1.39		OF	crop residue	5	32	0-15	0.24	0.0007	0.0937	0.0186	0.069	0.0026	-0.0719	0.0009			0.3134	0.0332	0.3613	0.0004												0.0779	0.0078	0.3083	0.0123	-0.3364	0.0204
41	Du Y et al		China	43.7833	123.333	4.8	570	upland	Maize	7.12	22.8	1.39		COF	NPK+crop residue	2.5	32	0-15	-0.9	0.0029	0.2212	0.0185	0.1582	0.0046	0.486	0.0069			2.048	0.0213	0.0417	0.0002												-0.177	0.0078	-0.639	0.0123	-0.8473	0.0204
42	Du Y et al		China	43.7833	123.333	4.8	570	upland	Maize	7.12	22.8	1.39		COF	NPK+crop residue	5	32	0-15	-0.38	0.0011	0.2647	0.0188	0.1703	0.0123	0.4639	0.0224			1.8015	0.0273	0.1666	0.0002												0.5162	0.0078	0.1422	0.0123	0.0466	0.0204
43	Yu D et al	Effects of straw return on bacterial communities in a wheat-maize rotation system in the North China Plain	China	39.6	122	11.9	550	upland	maize–wheat					OF	crop residue	12	6	5~25	0	0.0002	0.0173	0.0011	0.0397	0.0006			0.0812	0.0127	-0.0409	0.0394	0.1879	0.0138			-0.002	0	0.1859	0.0068	-1.63104	0.16658	0.275454	0.16745	PCoA	-0.067	0.0017	0.1493	0.0078	-0.0263	0.0044
44	Wang QF et al	Long-term fertilization changes bacterial diversity and bacterial communities in the maize rhizosphere of Chinese Mollisols	China	45.6667	126.583	4.4	545	upland	maize	7.22	15.5	1.47		OF	Manure	18.6	35	0-20	0.1	0.0002	0.1382	0.0029	0.1045	0.0001			-0.0135	0.0053	0.6964	0.0203	0.0257	0.0083			0.0297	0.0001	0.126	0.0127	0.475868	0.15583	0.75622	0.0486506	RDA			0.1674	0.0015	0.3859	0.0263
45	Wang QF et al		China	45.6667	126.583	4.4	545	upland	maize	7.22	15.5	1.47		COF	NPK+manure	18.6	35	0-20	-0.47	0.0006	0.118	0.0015	0.0681	0.0001			0.0681	0.0052	2.4702	0.0227	0.2401	0.0133			-0.0022	0.0001	-0.155	0.016	0.543063	0.179321	0.740444	0.0698528	RDA			-0.0067	0.0055	-0.1643	0.021
46	Li DD et al	Chemical nature of soil organic carbon under different long-term fertilization regimes is coupled with changes in the bacterial community composition in a Calcaric Fluvisol	China	35.0167	114.567	13.9	597	upland	maize–wheat	8.65	3.43	0.45		OF	Compost	12.7	27	0-20	-0.55	0.0001	1.0159	0.0004	1.0698	0.0033	0.4249	0.0004	1.4057	0.0085	2.6143	0.0071	1.3002	0.0041							-0.0392113	0.0836645	1.58679	0.0204272	PCoA	-0.0136	0.0005	0.1818	0.0047	-0.2439	0.0032
47	Kuppusamy S et al	Agriculturally relevant microbial community structure in long-term fertilized paddy soils as revealed by phospholipid fatty acid (PLFA) and pyrosequencing analyses	Korea	35.5	128.75	14.4	1085	paddy	rice					OF	Compost	10	45	0-15	-0.2	0	0.2489	0.0004	0.2877	0.0011	1.7918	0.0913																		0.1703	0.0078	-0.2271	0.0123	0.2877	0.0204
48	Kuppusamy S et al		Korea	35.5	128.75	14.4	1085	paddy	rice					COF	NPK+compost	10	45	0-15	-0.3	0	0.3686	0.0002	0.3285	0.0005	1.9459	0.0934																		0.1018	0.0078	-0.1159	0.0123	0.4975	0.0204
49	Kumar U et al	Continuous application of inorganic and organic fertilizers over 47 years in paddy soil alters the bacterial community structure and its influence on rice production	India	20.4167	85.9167	27.7	1540	paddy	rice	6.6	6.6	0.8	31	OF	Manure	5	47	0-20	0.25	0.0003	0.1982	0.0029	0.0533	0.0038			0.3015	0.0116			0.0931	0.0044			0.0066	0	-0.114	0.0037						-0.0587	0.0078	0.249	0.0123	-0.2336	0.0204
50	Kumar U et al		India	20.4167	85.9167	27.7	1540	paddy	rice	6.6	6.6	0.8	31	COF	NPK+manure	5	47	0-20	0	0.0003	0.3682	0.0029	0.2094	0.0038			0.4769	0.017			0.2377	0.0083			0.0116	0	-0.1343	0.0037						-0.0289	0.0078	0.056	0.0123	-0.0317	0.0204
51	Hu XJ et al	Soil Bacterial Communities Under Different Long-Term Fertilization Regimes in Three Locations Across the Black Soil Region of Northeast China	China	43.5167	124.8	4.5	530	upland	wheat-maize-soybean					OF	Manure	30	35	0-20	-0.3	0.0003			0.4954	0.0039	0.8739	0.0061	0.4336	0.0052	2.7553	0.0204	0.0392	0.0061	0.362	0.0002	-0.0144	0.004	-0.046	0.0001	0.4614	0.143191	1.43323	0.0370441	CCA	0.1001	0.0078	-0.1671	0.0123	0.2518	0.0204
52	Hu XJ et al		China	43.5167	124.8	4.5	530	upland	wheat-maize-soybean					COF	NPK+manure	30	35	0-20	-0.5	0.0003			0.5541	0.0039	1.0337	0.0061	1.315	0.0052	2.7293	0.0204	0.1823	0.0061	0.5319	0.0004	-0.0098	0.004	-0.0417	0.0001	-0.0526228	0.135267	1.95801	0.0296614	CCA	0.1218	0.0078	-0.469	0.0123	0.3365	0.0204
53	Hu XJ et al		China	45.8333	126.85	3.5	533	upland	wheat-maize-soybean					OF	Manure	18.6	34	0-20	0.17	0.0003			0.1239	0.0038	0.6061	0.006	0.0988	0.0052	2.2287	0.0204	0.2113	0.0061	0.2165	0.0059	0.013	0.004	0.0726	0.0001	-0.0258645	0.08096	1.12365	0.0240983	CCA	0.1173	0.0078	0.2373	0.0123	-0.3949	0.0204
54	Hu XJ et al		China	45.8333	126.85	3.5	533	upland	wheat-maize-soybean					COF	NPK+manure	18.6	34	0-20	-0.65	0.0003			0.1335	0.0038	0.5596	0.006	0.277	0.0053	2.2896	0.0204	0.207	0.0061	0.1239	0.0022	0.0213	0.004	0.0943	0.0003	1.11466	0.0935451	1.27087	0.0838551	CCA	0.2888	0.0078	0.0788	0.0123	-0.5002	0.0204
55	Hu XJ et al		China	50.25	127.45	-1.5	450	upland	wheat-maize-soybean					OF	Manure	15	35	0-20	0.36	0.0003			0.4763	0.0038	0.1226	0.0061	0.1339	0.0053	0.7231	0.0204	0.3292	0.0061	0.5676	0.0029	0.029	0.004	0.1287	0.0001	0.606843	0.0701111	1.73139	0.0306965	CCA	0.0352	0.0078	-0.1252	0.0123	0.0292	0.0204
56	Hu XJ et al		China	50.25	127.45	-1.5	450	upland	wheat-maize-soybean					COF	NPK+manure	15	35	0-20	0.28	0.0003			0.5474	0.0038	0.3711	0.0061	0.3898	0.0053	1.5166	0.0204	0.3169	0.0061	0.453	0.0025	0.0137	0.0039	0.1231	0.0001	0.637633	0.134987	1.59763	0.0567587	CCA	0.0662	0.0078	-0.3008	0.0123	0.0575	0.0204
57	Chen Y et al	Organic amendments shift the phosphorus-correlated microbial cooccurrence pattern in the peanut rhizosphere network during long-term fertilization regimes	China	28.25	116.917	17.6	1795	upland	peanut					COF	NPK+manure		27	0-20	0.34	0.0002	0.1311	0.0011	0.1921	0.0032	1.204	0.0131	0.26	0.0052	2.8449	0.0232	0.5265	0.0005			0.0358	0.0001	0.1576	0.0051	-0.105928	0.122802	1.62424	0.026316	RDA			0.1206	0.0123	-0.1379	0.0204
58	Chen Y et al		China	28.25	116.917	17.6	1795	upland	peanut					COF	NPK+crop residue		27	0-20	0.05	0.0001	0.0294	0.0041	0.1217	0.0059	0.5798	0.0525	0.0817	0.0052	0.7415	0.0243	0.4081	0.0007			-0.0188	0.0001	0.0476	0.0035	-0.68869	0.0605293	1.80171	0.0403902	RDA			0.0714	0.0123	-0.3939	0.0204
59	Bei SK et al	Response of the soil microbial community to different fertilizer inputs in a wheat-maize rotation on a calcareous soil	China	36.7	114.9	13.2	494	upland	maize–wheat	7.24	7.95	0.9		COF	NPK+compost	3	4	0-20	-0.06	0	0.0675	0.0017	0.2318	0.0114			1.0249	0.0999	0.689	0.0488	0.3277	0.0108					0	0.0037	-0.0782488	0.238048	-0.214443	0.0987337	NMDS	0.0279	0.0078	0.0126	0.0123	-0.177	0.0204
60	Bei SK et al		China	36.7	114.9	13.2	494	upland	maize–wheat	7.24	7.95	0.9		COF	NPK+crop residue	12.8	4	0-20	-0.03	0	0.0915	0.0006	0.2144	0.0145			1.2577	0.1331	0.7818	0.0517	0.6158	0.0277					0.0281	0.0037	0.395407	0.166768	0.0441855	0.0461265	NMDS	-0.0583	0.0078	0.0494	0.0123	-0.1144	0.0204
61	Bei SK et al		China	36.7	114.9	13.2	494	upland	maize–wheat	7.24	7.95	0.9		COF	NPK+compost	17.2	4	0-20	-0.05	0	0.1504	0.0005	0.2231	0.0123			1.5339	0.1027	0.7106	0.0733	0.585	0.0144					-0.0607	0.0037	-0.382185	0.212937	0.183944	0.0706523	NMDS	-0.0095	0.0078	0.0965	0.0123	-0.315	0.0204
62	Ai C et al	Distinct responses of soil bacterial and fungal communities to changes in fertilization regime and crop rotation	China	34.28	112.3	14.4	640	upland	maize–wheat	8.6	6.7	0.65		COF	NPK+manure	17.88	26	0-20	-0.4	0	0.5415	0.0032	0.5781	0.0012					2.4236	0.1288	1.2173	0.1172							-0.40426	0.144444	1.18007	0.0464229	NMDS	0.0905	0.0379	-0.1038	0.0599	-0.0807	0.0159
63	Ai C et al		China	34.28	112.3	14.4	640	upland	wheat-soybean	8.6	6.7	0.65		COF	NPK+manure	17.88	26	0-20	-0.4	0.0001	0.4931	0.0023	0.5596	0.0008					2.6815	0.009	1.1411	0.0053							0.503154	0.255143	0.753365	0.0796362	NMDS	-0.077	0.0137	0.1025	0.0126	-0.0906	0.0056
64	Zhao J et al	Influence of straw incorporation with and without straw decomposer on soil bacterial community structure and function in a rice-wheat cropping system	China	31.65	119.467	15	1050	paddy	wheat-rice	7.31	13.46	1.61	54.2	COF	NPK+crop residue	7.5	6	0-20	0.08	0.0007	0.0148	0.0206	0.0472	0.0074	0.0335	0.0067	0.3492	0.0035	0.2794	0.0249	0.1818	0.0155	0.3119	0.0086	-0.0124	0.0017	-0.0089	0.0066	0.0948525	0.132299	-0.102474	0.0799544	RDA	0.0353	0.0009	0.0282	0.0117	0.4053	0.0893
65	Zhao J et al		China	31.3	120.617	15	1050	paddy	wheat-rice	7.89	19.16	2.01	50.7	COF	NPK+crop residue	7.5	6	0-20	0.04	0.0002	0.1446	0.006	0.1193	0.0031	0.1518	0.001	0.0859	0.0019	0.891	0.0152	0.2049	0.0252	0.2124	0.0466	0.0309	0.0004	0.0861	0.0018	0.37898	0.144205	0.361751	0.053443	RDA	0.0764	0.0022	0.0504	0.0024	-0.1336	0.0276
66	Zhang YT et al	Fertilization Shapes Bacterial Community Structure by Alteration of Soil pH	China	30.8333	106.167	18.2	1150	upland	vegetable	8.35	10.73	0.99		OF	Compost	41.7	7	0-20	0.22	0.0001	0.5035	0.0136	0.4623	0.0011	0.7847	0.0203	0.8817	0.0036	2.0583	0.0041	0.4306	0.028			0.0105	0.0005	0.0483	0.0062	0.800865	0.146429	0.810675	0.0575744	PCoA
67	Zhang YT et al		China	30.8333	106.167	18.2	1150	upland	vegetable	8.35	10.73	0.99		COF	NPK+compost		7	0-20	0.03	0	0.157	0.0132	0.261	0.0008	0.373	0.0324	0.3192	0.0022	1.1191	0.0091	-0.1058	0.0073			0.0076	0.0005	0.0658	0.0073	0.621844	0.14358	0.409721	0.0485573	PCoA
68	Zhang YT et al		China	29.8	106.4	18.2	1150	upland	vegetable	6.82	10.43	1.16		OF	Compost	41.7	7	0-20	1.05	0.0005	0.7455	0.0216	0.6028	0.001	0.7273	0.0376	0.5289	0.0012	1.366	0.0016	1.4024	0.0518			0.0045	0.0004	0.0646	0.0082	0.551438	0.12754	2.12261	0.0435975	PCoA
69	Zhang YT et al		China	29.8	106.4	18.2	1150	upland	vegetable	6.82	10.43	1.16		COF	NPK+compost		7	0-20	0.1	0.0006	0.5532	0.0123	0.4807	0.0028	0.3385	0.0382	0.3645	0.0001	1.1126	0.0016	0.9725	0.0108			-0.0073	0.0007	0.0435	0.01	-0.23449	0.120566	2.46049	0.0275527	PCoA
70	Zhang YT et al		China	29.8667	106.317	18.2	1150	upland	vegetable	5.81	10.06	1.04		OF	Compost	41.7	7	0-20	0.59	0.0005	0.5178	0.028	0.5907	0.0034	0.7868	0.0088	0.7268	0.0218	1.5527	0.0366	1.6012	0.0068			0.0134	0.0008	0.0876	0.0127	-0.783441	0.24166	1.70109	0.0865613	PCoA
71	Zhang YT et al		China	29.8667	106.317	18.2	1150	upland	vegetable	5.81	10.06	1.04		COF	NPK+compost		7	0-20	0.11	0	0.3687	0.004	0.3006	0.0046	0.5179	0.0174	0.5849	0.0067	1.2873	0.0166	1.0227	0.0044			0.0119	0.001	0.1097	0.0139	0.28089	0.231885	1.07892	0.0590263	PCoA
72	Zhang YT et al		Canada	49.7	-112.8	14.7	251	upland	soybean					OF	Manure	60	43	0-15	-0.52	0.0003							0.8874	0.0052	1.059	0.0204														0.0726	0.0039	0.1167	0.0004	-0.3704	0.0008
73	Zhang YT et al		Canada	49.7	-112.8	14.7	251	upland	soybean					OF	Manure	60	29	0-15	-0.26	0.0003							0.0328	0.0052	0.6875	0.0204														-0.1259	0.0051	0.1875	0.0064	-0.0827	0.0127
74	Zhang YT et al		Canada	49.7	-112.8	14.7	251	upland	soybean					OF	Manure	60	13	0-15	-0.15	0.0003							-0.2695	0.0052	0.3416	0.0204														-0.0108	0.0078	0.0982	0.0009	0.0079	0.0024
75	Zhang XM et al	Changes in the abundance and structure of bacterial communities in the greenhouse tomato cultivation system under long-term fertilization treatments	China	36.9167	118.75	12.4	611	upland	Tomato	7.8	10.6	1.37		OF	crop residue+manure	36	11		-0.15	0.0012	0.4609	0.0033	0.464	0.0172			0.1506	0.0026	0.4154	0.0065	1.826	0.0287	0.1154	0.0001	-0.0468	0.0001	-0.0732	0.0002						0.2322	0.0078	-0.3946	0.0123	0.0194	0.0204
76	Wang JC et al	Impacts of inorganic and organic fertilization treatments on bacterial and fungal communities in a paddy soil	China	31.3	120.617	3.1	1063	paddy	maize-rice					OF	Compost	4.5	10	0-20	0.16	0			0.1622	0.0007			0.0061	0.0016	-0.3078	0.0079	-0.0651	0.0015							-0.912641	0.125036	0.85278	0.0732137	PCA	0.0435	0.0009	0.0488	0.0053	0.0689	0.014
77	Sun RB et al	Bacterial diversity in soils subjected to long-term chemical fertilization can be more stably maintained with the addition of livestock manure than wheat straw	China	33.2167	116.583	15.5	870	upland	wheat-soybean					COF	NPK+crop residue	3.75	30	0-10	-1.88	0			0.4224	0.0013			1.0289	0.0039	2.2564	0.0253	0.1836	0.0011					-0.4072	0.0001	-0.714752	0.0878614	3.23934	0.0340761	PCoA			0.1084	0.0094	-0.2668	0.0019
78	Sun RB et al		China	33.2167	116.583	15.5	870	upland	wheat-soybean					COF	NPK+crop residue	7.5	30	0-10	-1.95	0			0.6995	0.006			1.1577	0.0039	2.3503	0.029	0.3551	0.0002					-0.4728	0.0008	-1.30026	0.0918065	3.392	0.0581681	PCoA			0.0501	0.0149	-0.1245	0.0092
79	Sun RB et al		China	33.2167	116.583	15.5	870	upland	wheat-soybean					COF	NPK+manure	15	30	0-10	-1.05	0			0.7966	0.0015			0.9802	0.0039	3.6756	0.0254	0.3659	0.0005					0	0.0004	-0.436728	0.0924954	2.6663	0.0266374	PCoA			-0.2722	0.0121	-0.0593	0.0028
80	Sun RB et al		China	33.2167	116.583	15.5	870	upland	wheat-soybean					COF	NPK+manure	30	30	0-10	-0.16	0			1.0682	0.0011			1.1103	0.0039	3.3298	0.0236	1.3726	0.0005					0.0681	0.0011	0.186263	0.0863117	2.08894	0.021076	PCoA			-0.0777	0.0067	0.0717	0.0022
81	Pan H et al 2020	Organic and inorganic fertilizers respectively drive bacterial and fungal community compositions in a fluvo-aquic soil in northern China	China	34.2667	117.283	14	860	upland	potato	8.01	6.26	0.66		OF	Compost	37.5	38	0-10	-0.22	0.0003	0.2538	0.0029	0.7668	0.0039			0.8015	0.0052	3.6043	0.0204	0.5594	0.0061			0.1124	0.0009	0.2495	0	-2.04431	0.124349	2.35139	0.159231	PCA	-0.0033	0	0.254	0.0023	0.094	0.0013
82	Pan H et al 2020		China	34.2667	117.283	14	860	upland	potato	8.01	6.26	0.66		OF	Compost	37.5	38	0-10	-0.49	0.0003	0.1967	0.0029	0.9186	0.0038			0.7493	0.0053	3.2961	0.0204	0.6929	0.0061			0.0689	0.0014	-0.0111	0	0.0462548	0.112884	1.82114	0.023728	PCA	0.0066	0.0021	-0.0121	0.0017	0.0811	0.002
83	Schmid C et al	Organic Amendments in a Long-term Field Trial—Consequences for the Bulk Soil Bacterial Community as Revealed by Network Analysis	Germany	51.95	11.69	10	593	upland	beet-wheat-barley	6.25	7.5	0.8	8.9	OF	Manure	100	32	0-30	-0.03	0.0013							0.2474	0.0053	0.1254	0.0134	0.3247	0.0182			0.0166	0.0001
84	Schmid C et al		Germany	51.95	11.69	10	593	upland	beet-wheat-barley	6.25	7.5	0.8	8.9	OF	crop residue	10.2	32	0-30	-0.18	0.0023							0.3043	0.0052	0.0643	0.0138	0.3409	0.0239			0.0102	0.0001
85	Li F et al	Bacterial Community Structure after Long-term Organic and Inorganic Fertilization Reveals Important Associations between Soil Nutrients and Specific Taxa Involved in	China	34.7833	113.667	14.4	641	upland	maize–wheat				25	COF	NPK+compost	19.4	24	0-20	-0.03	0.0003	0.4205	0.0029	0.3102	0.0039					0.3962	0.0204	0.244	0.0061							1.06126	0.142751	1.58841	0.0683097	PCoA			0.2234	0.0123	-0.5946	0.0204
86	Li F et al		China	34.7833	113.667	14.4	641	upland	maize–wheat				25	COF	NPK+crop residue		24	0-20	-0.16	0.0003	0.3858	0.0029	0.3994	0.0039					0.0203	0.0204	0.4487	0.0061							1.83599	0.130097	0.976935	0.126681	PCoA			-0.0643	0.0123	-0.8825	0.0204
87	Gu YF et al	Long-term Fertilization Structures Bacterial and Archaeal Communities along Soil Depth Gradient in a Paddy Soil	China	30.1806	105.057	17.4	930	paddy	wheat-rice	8.6	9.2	1.09		OF	Manure	30	30	0-20									-0.0266	0.0053											0.226377	0.246997	0.407514	0.0853116	PCoA	0.0365	0.0078	-0.1412	0.0123	0.1286	0.0204
88	Feng YZ et al	Bacillus asahii comes to the fore in organic manure fertilized alkaline soils	China	35	114.4	15	603	upland	maize–wheat	8.65	3.4	0.45		OF	Compost	5.4	22	0-20	-0.36	0.0003	0.8595	0.0029					0.4824	0.0052	2.4636	0.0204	0.5171	0.0061					0.1574	0.0037	0.0320386	0.0459831	1.85595	0.0106716	NMDS	0.0679	0.0078	-0.5108	0.0123	-0.0938	0.0204
89	Feng YZ et al	Balanced Fertilization Decreases Environmental Filtering on Soil Bacterial Community Assemblage in North China	China	35	114.4	15	603	upland	maize–wheat	8.65	3.4	0.45		OF	Compost	5.4	23	0-20	-0.27	0.0001	0.9087	0.0039	1.204	0.0788					5.8021	1.3343	0.7831	0.0012					-0.0711	0.0003	0.563927	0.0850168	2.41896	0.0275462	PCoA
90	Feng YZ et al		China	35	114.4	15	603	upland	maize–wheat	8.65	3.4	0.45		COF	NPK+compost	5.4	23	0-20	-0.24	0.0001	0.6185	0.0041	0.9343	0.0788					5.6326	1.336	0.6511	0.0018					-0.04	0.0004	0.320522	0.0773319	2.36831	0.0198937	PCoA
91	Ding LJ et al	Increased microbial functional diversity under long-term organic and integrated fertilization in a paddy soil	China	28.9167	111.45	16.5	1447	paddy	rice				8.6	OF	crop residue	8.5	21	0-15	-0.01	0.0003			0.289	0.0039			-0.3378	0.0052	0.7214	0.0204	0.3053	0.0061	0.3629	0.0121					0.233303	0.10889	-0.0454367	0.0539248	PCoA	0.0517	0.0078	-0.0018	0.0123
92	Ding LJ et al		China	28.9167	111.45	16.5	1447	paddy	rice				8.6	COF	NPK+crop residue	8.5	21	0-15	0.08	0.0003			0.5226	0.0038			0.5082	0.0052	2.7243	0.0204	1.1303	0.0061	0.5343	0.0121					0.00012347	0.0790094	0.698338	0.0217842	PCoA	0.0509	0.0078	-0.4063	0.0123
93	Ding LJ et al		China	28.9167	111.45	16.5	1447	paddy	rice				8.6	COF	NPK+crop residue	4.25	21	0-15	-0.03	0.0003			0.3964	0.0039			0.1645	0.0053	1.8979	0.0204	0.4105	0.0061	0.4067	0.0121					-0.325694	0.0671317	0.628097	0.0290961	PCoA	0.0277	0.0078	-0.3564	0.0123
94	Chen YL et al	Changes in bacterial community of soil induced by long-term straw returning	China	36.1667	120.517	11.2	779	upland	maize–wheat	6.8	2.9	0.6		OF	crop residue	14.301	5	0-20	-0.1	0.0003	0.2276	0.0029	0.6381	0.0039					0.564	0.0204	0.033	0.0061			0.0658	0.004	0.1299	0.0037						0.1109	0.0078	0.0484	0.0123	-0.0309	0.0204
95	Chen YL et al		China	36.1667	120.517	11.2	779	upland	maize–wheat	6.8	2.9	0.6		OF	Compost	60	5	0-20	0	0.0003	0.7908	0.0029	0.9163	0.0038					1.4596	0.0204	1.3501	0.0061			0.0781	0.004	0.1372	0.0037						0.186	0.0078	0.0484	0.0123	0.0869	0.0204
96	Zhao J et al	Effects of organic–inorganic compound fertilizer with reduced chemical fertilizer application on crop yields, soil biological activity and bacterial community structure in a	China	31.3	120.617	15.4	1054	paddy	maize–wheat					COF	NPK+compost	6	2	0-20	0.06	0.0007	0.0766	0.0232	0.0896	0.0169	0.0553	0.0058	0.2592	0.0073	0.3374	0.0304	0.1591	0.0204	0.2622	0.0162												-0.139	0.0024	0.2168	0.1397
97	Zhao J et al		China	31.3	120.617	15.4	1054	paddy	maize–wheat					COF	NPK+compost	3.6	2	0-20	0.13	0.0005	0.126	0.0272	0.0752	0.0141	0.0445	0.0056	0.3219	0.0074	0.4855	0.0267	0.1967	0.0171	0.5601	0.0106												-0.129	0.0017	0.4311	0.0642
98	Xun WB	Significant alteration of soil bacterial communities and organic carbon decomposition by different long-term fertilization management conditions of extremely low-productivity arable soil in South China	China	26.75	111.883	18.3	1447	upland	maize–wheat	5.6	6.67	1.07		OF	Manure	60	22	0-20	1.48	0.0004	0.6773	0.0005	0.6093	0.0003	1.0704	0.001	0.5399	0.0067	2.6498	0.0028	1.507	0.0075	0.5912	0.0023	-0.1928	0	0.0548	0.0054	0.282422	0.138851	1.85744	0.0332441	NMDS	-0.0123	0.0078	-0.3316	0.0123	0.1052	0.0204
99	Xun WB		China	26.75	111.883	18.3	1447	upland	maize–wheat	5.6	6.67	1.07		COF	NPK+manure	41.69	22	0-20	0.98	0.0005	0.7351	0.0005	0.5967	0.0003	1.2528	0.0009	0.5661	0.0055	2.6632	0.0027	1.6502	0.0075	0.4713	0.0029	-0.0143	0	0.2371	0.0055	-0.193472	0.154925	2.02978	0.0342821	NMDS	0.3382	0.0078	-1.1567	0.0123	1.6093	0.0204
100	Xun WB		China	26.75	111.883	18.3	1447	upland	maize–wheat	5.6	6.67	1.07		COF	NPK+crop residue	1.038	22	0-20	-0.84	0.0004	0.3353	0.0005	0.2162	0.0003	0.865	0.0004	0.2322	0.0067	2.3089	0.0008	1.3163	0.0075	-0.4089	0.0039	-0.252	0			0.0770676	0.0926825	4.23672	0.0180152	NMDS
101	Sun L	Alteration of the soil bacterial community during parent material maturation driven by different fertilization treatments	China	45.445	111.876	17.8	1255	upland	vegetable					OF	crop residue		30		-0.18	0.0066	0.0572	0.0017	0.0834	0.0008	0	0.0013	0.1575	0.0006			0.3345	0.0001	0.0918	0.011	-0.2033	0.021	-0.3026	0.0139	0.921822	0.214423	0.644237	0.106505	CCA			0.0847	0.0063	0.1171	0.0373
102	Sun L		China	45.445	111.876	17.8	1255	upland	vegetable					COF	NPK+crop residue		30		-0.96	0	1.0987	0.0001	0.8718	0.0009	1.6848	0.0007	0.7977	0.0004			0.6512	0.0001	0.4245	0.0068	-0.0886	0	-0.2076	0.0028	0.576062	0.12541	2.82379	0.0431718	CCA			-0.0666	0.0003	0.5048	0.0258
103	Sun L		China	45.445	111.876	17.8	1255	upland	vegetable					OF	crop residue		30		-0.88	0	0.5455	0.0021	0.2666	0.0007	0.037	0.0002	0.4247	0.0011			0.3185	0	0.1481	0.0112	0.0196	0.0002	0.129	0.0129	0.55414	0.109918	1.04884	0.0499053	CCA			-0.1762	0.0029	0.0882	0.0246
104	Sun L		China	45.445	111.876	17.8	1255	upland	vegetable					COF	NPK+crop residue		30		-1.01	0	0.6531	0.0033	0.4595	0.0003	1.183	0.0001	0.9661	0.0011			1.4069	0	0.3767	0.0009	-0.0015	0.0002	0.0698	0.0111	-0.196232	0.09575	1.75034	0.0236165	CCA			-0.427	0.0028	0.2848	0.0148
105	Sun L		China	45.445	111.876	17.8	1255	upland	vegetable					OF	crop residue		30		0.31	0	0.104	0.0031	0.0548	0.0103	0.1495	0.0006	0.0995	0.0005			0.2853	0.0001	0.3116	0.014	-0.0517	0.0001	-0.2419	0.0021	0.571453	0.168683	2.34245	0.0574548	CCA			0.2279	0.0006	-0.1862	0.0014
106	Sun L		China	45.445	111.876	17.8	1255	upland	vegetable					COF	NPK+crop residue		30		-0.39	0	0.6725	0.0037	0.65	0.0004	1.4933	0.0004	0.2975	0.0005			0.8987	0.0001	0.6604	0.0149	-0.2292	0	-0.8599	0.0056	-1.16196	0.119464	2.96375	0.0868998	CCA			0.0656	0.0033	1.015	0.002
107	Luo PY et al	Influence of long-term fertilization on soil microbial biomass, dehydrogenase activity, and bacterial and fungal community structure in a brown soil of northeast China	China	40.8	123.55	7.5	649	upland	maize-maize-soybean	6.5	15.9	0.8	23	OF	Manure	27	33	0-20	0.47	0.0002	0.5048	0	0.2499	0.0006	0.555	0.0001			4.9493	0.0038	0.0645	0.0001	1.5935	0.0005	0.0639	0.003
108	Luo PY et al		China	40.8	123.55	7.5	649	upland	maize-maize-soybean	6.5	15.9	0.8	23	COF	NPK+manure	27	33	0-20	0.17	0.0002	0.574	0	0.2398	0.0001	1.0087	0.0004			5.1987	0.0038	0.351	0	1.6657	0.0008	0.0958	0.003
109	Wang Y et al	Differential responses of soil bacterial taxa to long-term P, N, and organic manure application	China	35.2	107.667	9.1	584	upland	wheat	8.4	6.5	0.8	24	OF	Manure		30	0-20	0.03	0.0001	0.418	0.0022	0.422	0.0031									0.7288	0.9101	0.0301	0.0001	0.2873	0.0014								0.368	0.01	0.1322	0.0014
110	Tian W et al	Responses of microbial activity, abundance, and community in wheat soil after three years of heavy fertilization with manure-based compost and inorganic nitrogen	China	31.6567	120.085	16.05	1048	paddy	wheat-rice	5.72	11.67	0.39	26.59	OF	Compost	26.966	2	0-25	0.61	0.0003	0.6667	0.0029	1.2777	0.0039	0.6579	0.0061	0.0563	0.0052	2.0123	0.0204					-0.0132	0.004	-0.0132	0.0037	-0.107446	0.271297	1.78387	0.0542664	PCA	0.2985	0.0078	-0.1321	0.0123	0.1137	0.0204
111	Zhao J et al	Responses of Bacterial Communities in Arable Soils in a Rice-Wheat Cropping System to Different Fertilizer Regimes and Sampling Times	China	31.65	119.467	15.3	1063.6	paddy	wheat-rice					COF	NPK+compost	0.4	2	0-20	0.1	0.0002	0.066	0.006	0.1061	0.0016	0.081	0.0258	0.1549	0.0012	0.5823	0.0239	0.1481	0.0309	0.3218	0.0172	0.0045	0	0.0425	0.0068	0.657512	0.161276	1.1821	0.0675251	RDA	0.0211	0.0005	-0.0292	0.0025	-0.1466	0.0166
112	Zhao J et al		China	31.65	119.467	15.3	1063.6	paddy	wheat-rice					COF	NPK+crop residue		2	0-20	0.12	0.0001	0.092	0.0078	0.1248	0.0015	0.0698	0.0232	0.1614	0.0011	0.6294	0.0302	0.2916	0.0359	0.2474	0.0213	0.006	0	0.0412	0.0056	0.641488	0.125516	1.53647	0.0499681	RDA	0.0649	0.0008	-0.0233	0.0023	-0.0465	0.0158
113	Zhao J et al		China	31.65	119.467	15.3	1063.6	paddy	wheat-rice					COF	NPK+compost		2	0-20	0.26	0.0002	0.1066	0.0071	0.137	0.0017	0.1029	0.0235	0.1431	0.0011	0.7175	0.0331	0.2154	0.032	0.3651	0.017	0.0105	0	0.064	0.0059	-0.600549	0.133892	1.53552	0.0460714	RDA	0.0359	0.0009	-0.1156	0.0033	0.1671	0.0755
114	Yuan HZ et al	Soil microbial biomass and bacterial and fungal community structures responses to long-term fertilization in paddy soils	China	28.05	112	17	1526	paddy	rice	6.6	20.13	2.05		COF	NPK+crop residue	2.625	28	0-20	-0.5	0.0002	0.1623	0.0002	0.3351	0.0001	0.7024	0.0006	0.3915	0.0015	1.7182	0.0092	0.9679	0.0008	0.4997	0.002	0.1294	0.0001			0.02057	0.0788764	2.98554	0.0157	RDA
115	Yu W T et al	Microbial biomass and community composition in a Luvisol soil as influenced by long-term land use and fertilization	China	41.5333	123.383	7.5	700	upland	soybean–corn–corn	6.7	22.1	0.8		OF	Manure		18	0-20					0.1021	0.0038	0.0405	0.006	0.0178	0.0052	0.2752	0.0204	0.1219	0.0061	0.419	0.0015	0.0166	0.0039	0.0488	0.0037
116	Yu W T et al		China	41.5333	123.383	7.5	700	upland	soybean–corn–corn	6.7	22.1	0.8		COF	NPK+manure		18	0-20					0.2465	0.0039	0.2918	0.0061	0.0849	0.0053	2.378	0.0204	0.4495	0.0061	0.1424	0.001	0.0585	0.004	0.1823	0.0037
117	Daquiado A R et al	Pyrosequencing analysis of bacterial community diversity in long-term fertilized paddy field soil	Korea	36.6	128.75	12.9	1020	paddy	rice					OF	Compost	10	39	0-15	0.1	0.0078	0.2541	0.0041	0.2451	0.2025					0.4589	0.0022					-0.0602	0.004	-0.4854	0.0037						0.1739	0.0078	-0.2472	0.0123	0.3043	0.0204
118	Daquiado A R et al		Korea	36.6	128.75	12.9	1020	paddy	rice					COF	NPK+compost	10	39	0-15	0.4	0.0071	0.3604	0.0075	0.2877	0.1119					1.2689	0.0018					-0.0256	0.004	-0.1771	0.0037						0.0928	0.0078	-0.1566	0.0123	0.5111	0.0204
119	Wu F S et al	The community structure of microbial in arable soil under different long-term fertilization regimes in the Loess Plateau of China	China	35.2667	107.5	10.2	550	upland	maize–wheat	8.2	6.15	0.95		OF	Manure	75	29	0-15	0.28	0	0.2716	0	0.4055	0.0045	-0.0171	0.0004			1.5041	0.0033							0.1594	0.0037
120	Wu M N et L	Effect of long-term fertilization on bacterial composition in rice paddy soil	China	28.9167	111.55	17.6	1658	paddy	rice	5.41	15.4	1.88		COF	NPK+crop residue	8.5	17	0-15	-0.12	0.0021	0.4106	0.0015	0.4205	0.0039			0.3022	0.0166	1.3534	0.0045	1.4131	0.0234			0.0744	0.0013			-0.451001	0.072926	0.792208	0.033798	CCA			0.1398	0.0123	0	0.0204
121	Kamaa M et al	Effects of organic and inorganic fertilization on soil bacterial and fungal microbial diversity in the Kabete long-term trial, Kenya	Kenya	-1.25	36.6833	18.2	980	upland	maize–bean		21.29	1.6		OF	crop residue		32	0-10																	-0.0226	0.003
122	Kamaa M et al		Kenya	-1.25	36.6833	18.2	980	upland	maize–bean		21.29	1.6		OF	Manure	10	32	0-10																	0.1896	0.003
123	Ge Y et al	Long-term Fertilization Regimes Affect Bacterial Community Structure and Diversity of an Agricultural Soil in Northern China	China	35	114.4	13.6	615	upland	maize					OF	Compost	5.516	17	0-20	-0.15	0	0.8326	0.0022					1.075	0.0039	1.4538	0.0043	0.746	0.005			0.0581	0.0004	0.5008	0.0156						-0.3349	0.0059	-0.0131	0.0092	0.2232	0.0153
124	Ge Y et al		China	35	114.4	13.6	615	upland	maize					COF	NPK+compost	2.758	17	0-20	-0.23	0	0.564	0.0019					0.9091	0.0039	1.2792	0.0022	0.7018	0.0102			0.1032	0.0003	0.3716	0.0183						-0.0717	0.0059	0.1105	0.0092	-0.3448	0.0153
125	Ros M et al	Hydrolase activities, microbial biomass and bacterial community in a soil after long-term amendment with different composts	Australia	-31.64	116.07	18.4	764	upland	maize, wheat and barley	6.8	11.02			OF	Compost	10.94	12	0-10			0.1573	0.0021	0.1823	0.0029											0.0366	0.003
126	Ros M et al		Australia	-31.64	116.07	18.4	764	upland	maize, wheat and barley	6.8	11.02			OF	Compost	13.46	12	0-10			0.1765	0.0021	0.1252	0.0029											0.0221	0.003
127	Hamm A C et al	Bacterial communities of an agricultural soil amended with solid pig and dairy manures, and urea fertilizer	Canada	49.6375	-97.5667	3.5	516	paddy	rice	7	21		70	OF	Manure	44.67	3	0-15																	0	0.003	-0.055	0.0028
128	Hamm A C et al		Canada	49.6375	-97.5667	3.5	516	paddy	rice	7	21		70	OF	Manure	47	3	0-15																	0.0157	0.003	-0.0135	0.0028
129	Wang JJ et al	Effects of tillage and residue incorporation on composition and abundance of microbial communities of a fluvo-aquic soil	China	35.0167	114.533	13.9	615.1	upland	maize–wheat	8.24	6.46	1.39		OF	crop residue	3.75	3	0-20	-0.4	0.0009	-0.3009	0.0037	-0.0368	0.0004									0.1424	0.0305	-0.1422	0.0029
130	Wang JJ et al		China	35.0167	114.533	13.9	615.1	upland	maize–wheat	8.24	6.46	1.39		OF	crop residue	7.5	3	0-20	-0.37	0.0009	0.1325	0.0258	-0.0121	0.0004									0.0986	0.0541	-0.0666	0.0029
131	Wei D et al	Bacterial Community Structure and Diversity in a Black Soil as Affected by Long-Term Fertilization	China	45.6667	126.583	3	575	upland	wheat-maize-soybean					OF	Manure	18.6	25	0-20	0.15	0.0003	0.1354	0.0029					0.0077	0.0052	1.2809	0.0204	0.08	0.0061	0.1542	0.0121	0.0126	0.0031	0.0725	0.0045	-0.0460564	0.143587	0.388526	0.0489354	PCA
132	Wei D et al		China	45.6667	126.583	3	575	upland	wheat-maize-soybean					COF	NPK+manure	18.6	25	0-20	-0.73	0.0003	0.1152	0.0029					0.0889	0.0052	2.9232	0.0204	0.5793	0.0061	0.5831	0.0121	0.0109	0.0031	0.0106	0.0048	-0.0676124	0.15418	0.321896	0.0433279	PCA
133	Wang G H et al	Effects of Fertilization on Soil Microbial Abundance and Community Structure at DNA and cDNA Levels in Paddy Soils	China	44.2	125.55	4.4	520	upland	corn					OF	Manure	40	15	0-20	0.27	0.0003	0.1015	0.0029					0.2398	0.0052	1.6094	0.0204	0.6785	0.0061	0.5931	0.0121	0.0059	0			-0.959966	0.242229	0.108254	0.136089	PCA
134	Wang G H et al		China	44.2	125.55	4.4	520	upland	corn					COF	NPK+manure	20	15	0-20	-0.49	0.0003	0.0771	0.0029					0.3445	0.0052	1.4759	0.0204	0.3957	0.0061	0.3455	0.0121	-0.039	0			0.802691	0.271191	1.09842	0.0809775	PCA
135	Ahn J H et al	Characterization of the Bacterial and Archaeal Communities in Rice Field Soils Subjected to Long-Term Fertilization Practices	Korea	37.2667	126.983	12.5	1228	paddy	rice					COF	NPK+compost	7.5	57	0-15	-0.4	0.0003	0.4187	0.0021								2.3647	0.0153				-0.0924	0.003	-0.4987	0.0028						0.0679	0.0059	-0.4055	0.0092	0.2782	0.0153
136	Cederlund H et al	Soil carbon quality and nitrogen fertilization structure bacterial communities with predictable responses of major bacterial phyla	Sweden	17.658	59.81	6	531	upland	maize	6.6	15	1.7	36.5	OF	crop residue	8	46	0-20	0.2	0.0002	0.1431	0.0029	0.0741	0.0029																						-0.0185	0.0069	-0.0618	0.0053
137	Li CH et al	Change in deep soil microbial communities due to long-term fertilization	China	44.2833	87.9333	9.6	164	upland	wheat	8.7	6.5			COF	NPK+crop residue	5.4	20	0-20									0.0881	0.0039																0.5068	0.0059	0.0845	0.0092	0.1485	0.0153
138	Li CH et al	Profile Changes in the Soil Microbial Community When Desert Becomes Oasis	China	44.2833	87.9333	9.6	159	upland	wheat					COF	NPK+crop residue	2.5	21	0-20	-0.3	0.0003	0.3368	0.0014	0.1706	0.0037									0.3054	0.0044	-0.0375	0.004	-0.1496	0.0037						0.1178	0.0078	-0.5707	0.0123	0.0924	0.0204
139	Li CH et al		China	44.2833	87.9333	9.6	159	upland	wheat					COF	NPK+manure	2.5	21	0-20	-0.3	0.0002	0.4558	0.0016	0.4873	0.0033									0.2877	0.0046	-0.022	0.004	-0.0176	0.0037						0.1849	0.0078	-0.7378	0.0123	-0.2699	0.0204
140	Li J et al	Microbial community structure and functional metabolic diversity are associated with organic carbon availability in an agricultural soil	China	36.8333	116.567	13.4	569	upland	maize–wheat		3.93	0.51	21.4	OF	Compost	30	25	0-20	-0.2	0.0002	0.7773	0.0044	0.4796	0.002	0.4055	0.0081									0.0355	0.0007	0.1236	0.0084	0.0623164	0.106689	2.23516	0.0250589	RDA
141	Li J et al		China	36.8333	116.567	13.4	569	upland	maize–wheat		3.93	0.51	21.4	COF	NPK+compost	15	25	0-20	-0.3	0.0001	0.6012	0.0032	0.2683	0.0167	0.4055	0.0081									0.022	0.0007	0.076	0.0086	0.499356	0.0919235	1.42134	0.0293662	RDA
142	Li J et al		China	36.8333	116.567	13.4	569	upland	maize–wheat		3.93	0.51	21.4	OF	Compost	60	25	0-20	-0.6	0.0002	1.245	0.0021	0.8023	0.0049	0.9163	0.0081									0.0435	0.0007	0.1691	0.0067	1.25368	0.104458	1.68537	0.0613262	RDA
143	Li J et al		China	40.2167	116.233	11	600	upland	maize–wheat	8.12	7.48	0.48	14.7	COF	NPK+manure	33	15	0-20	-0.69	0	0.8125	0.0034	1.0806	0.0116	1.4338	0.001									0.1947	0.0019	0.5465	0.0358	-0.164474	0.127771	0.979084	0.028161	RDA
144	Li J et al		China	40.2167	116.233	11	600	upland	maize–wheat	8.12	7.48	0.48	14.7	COF	NPK+crop residue	2.17	15	0-20	-0.23	0.0001	0.2095	0.003	0.4964	0.0144	0.3441	0.0005									0.1616	0.0026	0.3102	0.0375	0.0181622	0.067376	0.662521	0.0192465	RDA
145	Ding JL et al	Effect of 35 years inorganic fertilizer and manure amendment on structure of bacterial and archaeal communities in black soil of northeast China	China	45.6667	126.583	3.5	533	upland	wheat-maize-soybean	7.22	15.49	1.47		OF	Manure	18.6	34	5~25	0.11	0	0.1233	0	0.0415	0.0009	1.028	0.0015	0.0725	0.0098	1.5678	0.034	0.1907	0.0116			0.0127	0	-0.018	0.0004	0.179074	0.121089	1.2119	0.0330483	PCoA	-0.026	0.0078	-0.0161	0.0123	-0.0736	0.0204
146	Ding JL et al		China	45.6667	126.583	3.5	533	upland	wheat-maize-soybean	7.22	15.49	1.47		COF	NPK+manure	18.6	34	5~25	-0.6	0.0003	0.0475	0.0001	0.142	0.0023	1.1285	0.0029	0.1691	0.0046	3.5744	0.0455	0.0889	0.0125			-0.0064	0.0001	-0.0304	0.0005	0.367205	0.0890228	1.59987	0.0269786	PCoA	0.0661	0.0078	-0.1919	0.0123	-0.0995	0.0204
147	Francioli D et al	Mineral vs. Organic Amendments: Microbial Community Structure, Activity and Abundance of Agriculturally Relevant Microbes Are Driven by Long-Term Fertilization	Germany	51.4	11.8833	8.7	484	upland	sugar beet, barley, potato and wheat				21	OF	Manure	10	110	0-20	-0.29	0	0.2719	0.0001	0.4353	0.0005			0.2842	0.0031					0.408	0.0013	0.0186	0.0001	0.0865	0.0012	0.279945	0.020432	1.68217	0.00654364	NMDS	0.0968	0.0004	-0.1561	0.0023	-0.0452	0.0008
148	Francioli D et al		Germany	51.4	11.8833	8.7	484	upland	sugar beet, barley, potato and wheat				21	COF	NPK+manure	10	110	0-20	-0.43	0	0.3585	0	0.5978	0.0001			0.9829	0.0032					0.6013	0.0014	0.0278	0.0001	0.1405	0.0007	1.21865	0.0245642	1.5359	0.0258761	NMDS	0.0919	0.0005	-0.1824	0.0033	-0.0321	0.0005
149	Ding et al	Responses of Micropopulation in Black Soil of Northeast China to Long-Term Fertilization and Crops	China	45.6667	126.583	3.5	533	upland	Wheat-soybean-corn					OF	Manure	18.6	35	5~25	0.11	0	0.1233	0.0001	0.0415	0.0009			0.1189	0.0053	1.567	0.034	0.1907	0.0116			0.0469	0.0018	0.0322	0.0003						0.088	0.0078	-0.0903	0.0123	-0.1144	0.0204
150	Ding et al		China	45.6667	126.583	3.5	533	upland	Wheat-soybean-corn					COF	NPK+manure	18.6	35	5~25	-0.6	0.0003	0.0475	0.0002	0.1197	0.0006			0.2569	0.0052	3.5744	0.0455	0.0889	0.0125			0.0382	0.0018	0.0044	0.0017						0.2054	0.0078	-0.266	0.0123	-0.1931	0.0204
151	Chen et al	Effect of Organic Manure and Biochar with Equal Amount of Carbon Input on Microbial Diversity and Respiration of Red Soil	China	28.2167	116.917	17.8	1795	upland	Corn-Peanut	4.73	2.52	0.4		COF	NPK+manure		2	0-20																	-0.0267	0
152	Chen et al		China	28.2167	116.917	17.8	1795	upland	Corn-Peanut	4.73	2.52	0.4		COF	NPK+manure+crop residue		2	0-20																	0.0758	0
153	Chen et al		China	28.2167	116.917	17.8	1795	upland	Corn-Peanut	4.73	2.52	0.4		COF	NPK+manure		2	0-20																	0.1334	0
154	Chen et al		China	28.2167	116.917	17.8	1795	upland	Corn-Peanut	4.73	2.52	0.4		COF	NPK+manure+crop residue		2	0-20																	0.1185	0
155	Tian et al	Environmental Risk Caused by Successive and Heavy Application of Mineral Fertilizer and Compost With the Same Amount of Nitrogen Applied	China	31.49	120.085	16.5	1113	paddy	wheat-rice	5.93	13.25	1.06		OF	Manure	17.91	3	0-25					0.5035	0.0009	1.1776	0.0191	0.2517	0.0052	2.5152	0.0601			0.1843	0.0009	-0.0647	0
156	Zeng et al	Effects of Different Fertilization Regimes on Abundance and Composition of the Bacterial Community in Greenhouse Vegetable Soils	China	37.8833	102.667	8.5	178	upland	vegetable	8.65	7.19	0.83		COF	NPK+manure		3	0-20	-0.54	0.0003	0.2699	0.0029			0.3817	0.0061									0.0523	0.001	0.2053	0.0049	0.652153	0.211312	0.7243	0.0695722	RDA
157	Zeng et al		China	37.8833	102.667	8.5	178	upland	vegetable	8.65	7.19	0.83		COF	NPK+manure		3	0-20	-0.6	0.0003	0.5391	0.0029			0.5656	0.0061									0.033	0.0009	0.1206	0.0045	0.742104	0.231963	0.761148	0.0825109	RDA
158	Zeng et al		China	37.8833	102.667	8.5	178	upland	vegetable	8.65	7.19	0.83		OF	Manure		3	0-20	-0.32	0.0003	0.433	0.0029			0.3324	0.0061									0.0427	0.001	0.1699	0.0049	0.236226	0.217851	0.756468	0.0521624	RDA
159	Cai et al	Effect of Long-term Fertilization on Microbial Diversity of Black Loessial Soil Based on 454 Sequencing Technology	China	35.25	107.75	10.5	587	upland	wheat	8.4	6.09	0.8		OF	Compost	75	27	0-15																	0.0493	0.004	0.4829	0.0037
160	Yuan et al	Illumina Amplicon Sequencing of 16S rDNA Tag reveals bacteria community development of Long-term Straw returning Soil	China	36.99	120.72	12.6	682	upland	wheat-corn	6.8	2.91	0.6		OF	crop residue		6	0-20	-0.1	0.0003	0.2644	0.0029	0.6381	0.0039			0.6876	0.0052	0.564	0.0204	0.033	0.0061			0.0658	0.004	0.1299	0.0037						0.1018	0.0078	0.0583	0.0123	0	0.0204
161	Yuan et al		China	36.99	120.72	12.6	682	upland	wheat-corn	6.8	2.91	0.6		OF	Manure	60	6	0-20	0	0.0003	0.9782	0.0029	0.9163	0.0038			1.8318	0.0052	1.4596	0.0204	1.4565	0.0061			0.0781	0.004	0.1372	0.0037						0.1843	0.0078	0.0392	0.0123	0.2009	0.0204
162	Wang et al	Effects of fertilization on bacterial community structure and function in a black soil of Dehui region estimated by Biolog and PCR -DGGE methods	China	44.2	125.55	4.4	520	upland	corn					OF	Manure	40	6	0-20	0.27	0.0003	0.1015	0.0029					0.2398	0.0052	1.6094	0.0204	0.6785	0.0061	0.5931	0.0121	0.0059	0
163	Wang et al		China	44.2	125.55	4.4	520	upland	corn					COF	NPK+manure	20	6	0-20	-0.49	0.0003	0.0774	0.0029					0.3445	0.0052	1.4759	0.0204	0.3957	0.0061	0.3455	0.0121	-0.039	0
164	Wang et al	Effects of Fertilization on Soil Microbial Abundance and Community Structure at DNA and cDNA Levels in Paddy Soils	China	28.5511	113.331	17.5	1330	paddy	rice	5.08	18.9	2.08		COF	NPK+crop residue	6	2	0-20	-0.02	0.0005	0.0686	0.007					0.695	0.007					0.1189	0.0162	-0.0794	0.0002			-0.320265	0.067295	2.64592	0.0166394	PCA
165	Wang et al		China	28.5511	113.331	17.5	1330	paddy	rice	5.08	18.9	2.08		COF	NPK+crop residue	12	2	0-20	0.16	0.0003	0.1202	0.0027					1.1816	0.0073					0.181	0.0144	-0.0961	0.0005			0.597372	0.0982934	2.58209	0.0465953	PCA
166	Lu et al	Microbial community diversity and enzyme activity of red paddy soil under long-term combined inorganic-organic fertilization	China	28.25	116.333	17.7	1400	paddy	rice	6.9	16.3	1.49		COF	NPK+manure+crop residue	45	30	0-16	0.14	0.0047	0.2079	0.0014	0.3863	0.0032											0.0856	0.0001	0.6931	0.0029
167	Yu et al	Influences of long-term application of organic and inorganic fertilizers on the structure and function of microbial community in red soil	China	26.75	111.87	18.1	1417	upland	wheat-corn	5.7	7.89	1.07		OF	Manure	60	23	0-20	1.23	0	0.9246	0.0021	0.7905	0.0029			1.0664	0.0039	4	0.0153					0.0834	0.0008			1.06842	0.112323	1.9214	0.0773111	RDA	0.2451	0.0059	0.4507	0.0092	-0.2683	0.0153
168	Yu et al		China	26.75	111.87	18.1	1417	upland	wheat-corn	5.7	7.89	1.07		COF	NPK+manure	41.7	23	0-20	0.59	0	0.9691	0.0021	0.7644	0.0029			1.0056	0.0039	4.0581	0.0153					0.256	0.0002			0.861085	0.110722	2.22884	0.0604054	RDA	0.4419	0.0059	-0.2877	0.0092	0.7503	0.0153
169	Nie et al	Effects of long-term fertilizations on microbial community structure and diversity in yellow clayey paddy soil	China	26.2253	119.069	19.5	1350.9	paddy	rice	4.9	12.53	1.4		COF	NPK+crop residue	4.5	33	0-20	-0.14	0.0006	0.2983	0.0059	0.4595	0.0009									0.5458	0.0038	0.0189	0.001	-0.0153	0.0012	0.549421	0.0438625	2.78339	0.0270247	RDA	0.3774	0.0076	-0.4487	0.0051	0.4411	0.001
170	Yuan et al	Effects of long-term fertilization on bacterial and archaeal diversity and community structure within subtropical red paddy soils	China	28.4667	111.9	1.5	570	paddy	rice	6.1	20.1	2.01		COF	NPK+crop residue		24	0-15	-0.4	0.0002	0.2242	0.0003	0.275	0.0002			0.2778	0.0006	1.4262	0.0157	0.4602	0.0047			0.0327	0.004
171	Yang et al	Differences of soil biological characteristics and bacterial diversity of sugarcane fields in red soil region affected by long-term single chemical fertilization	China	23.39	109.07	20.2	1500	upland	sugar cane	4.5	15.9	1.56		COF	NPK+compost	4.5	19	0-30	-0.02	0.0001	-0.3018	0.0024	0.4199	0.0585	0.0435	0.0129	0.8168	0.0078	1.5356	0.0024	0.2877	0.0038	0.2426	0	0.3259	0.0039	0.5436	0.0037
172	Xu et al	Effects of long term fertilizations on microbial biomass C and N and bacterial community structure in an aquic brown soil	China	41.5333	122.383	7.5	1550	upland	soybean–corn–corn	6.4	11.35	1.04		OF	Manure		19	0-20	0.13	0	0.1989	0	0.1011	0	0.0541	0.0002			0.3102	0	0.1738	0.0001	0.3192	0.0002	0.1133	0.004	0.0341	0.0037
173	Xu et al		China	41.5333	122.383	7.5	1550	upland	soybean–corn–corn	6.4	11.35	1.04		COF	NPK+manure		19	0-20	-0.53	0	0.2927	0	0.2358	0	0.3083	0.0001			1.9841	0	0.4092	0.0002	0.1298	0.0002	-0.0408	0.004	0	0.0037
174	Zhang et al	Effects of Warming and Straw Application on Soil Microbial Biomass Carbon and Nitrogen and Bacterial Community Structure	China	32.16	118.86	15.9	1013	upland	wheat-soybean	6.3	19.4	1.15		OF	crop residue	4.58	4	0-20															1.4536	0.2063	0.2858	0.0246	0.1343	0.0196
175	Zhao et al	Effects of organic manure partial substitution for chemical fertilizer on crop yield and soil microbiome in a rice-wheat cropping system	China	31.65	119.467	15.3	1063.6	paddy	wheat-corn	7.31	11.43	1.61		COF	NPK+manure	6	2	0-20															0.3882	0.021	0.003	0	0.0116	0.0004	1.60545	0.158365	0.258407	0.151018	PCA	0.0899	0.0059	-0.1032	0.0092	0	0.0153
176	Zhao et al		China	31.65	119.467	15.3	1063.6	paddy	wheat-corn	7.31	11.43	1.61		COF	NPK+manure	12	2	0-20															0.4183	0.0212	0.0076	0	0.0238	0.0001	0.471059	0.128316	0.695457	0.0432197	PCA	0.0682	0.0059	-0.04	0.0092	0	0.0153
177	Wang et al	Effects of fertilization and straw incorporation on bacterial communities in lime concretion black soil	China	33.26	116.57	14.7	822	upland	wheat-corn		7.23	0.14		OF	crop residue	7.5	5	0-30	-0.48	0	0.0735	0.0026	0.0493	0.0001					0.6856	0.0354	0.1577	0.0014			0.0401	0.0001	0.058	0.0006						-0.0354	0.0078	-0.3164	0.0123	0.1608	0.0204
178	Bi et al	Effects of fertilization and soil management on microbial biomass and community	China	41.5333	122.383	7.5	650	upland	corn-corn-soybean	6.5	11.57	1.06		OF	Manure		18	0-20															0.1162	0.0121	0.0162	0.0039	0.0488	0.0037
179	Bi et al		China	41.5333	122.383	7.5	650	upland	corn-corn-soybean	6.5	11.57	1.06		COF	NPK+manure		18	0-20															0.4022	0.0121	0.0597	0.004	0.1823	0.0037
180	Luo et al	Deciphering the associations between soil microbial diversity and ecosystem multifunctionality driven by long-term fertilization management	China	28.4	116.333	17.3	1549	upland	corn-corn	6	5.45	0.98	2.22	OF	Manure		30	0-20	1.47	0.0001	0.4607	0.0003	0.4055	0.0002	0.9919	0.0032	1.3425	0.0056	3.1257	0.0069							0.08	0.0002	-0.0201429	0.035461	1.28733	0.0107747	PcoA	0.4901	0.0059	-0.1039	0.0092	0.0522	0.0153
181	Luo et al		China	28.4	116.333	17.3	1549	upland	corn-corn	6	5.45	0.98	2.22	COF	NPK+manure	30	30	0-20	0.82	0.0001	0.4581	0.0003	0.3909	0.0005	1.3218	0.0013	1.0641	0.0174	2.9508	0.0064							0.1947	0.0002	-0.0428756	0.0433244	1.91157	0.01053	PcoA	0.3067	0.0059	0.0088	0.0092	0.1796	0.0153
182	Luo et al		China	28.4	116.333	15	870	upland	corn-wheat	7.6	5.93	0.78	24.86	OF	Manure		35	0-20	0.54	0	0.5098	0.0005	0.47	0.0002	0.539	0.0017	1.3211	0.0027	2.6027	0.0238							0.0715	0.0001	0.629782	0.0865002	1.15813	0.0439687	PcoA	0.3042	0.0078	-0.5108	0.0204	-0.103	0.0123
183	Luo et al		China	28.4	116.333	15	870	upland	corn-wheat	7.6	5.93	0.78	24.86	COF	NPK+manure		35	0-20	-0.03	0	0.3936	0.0013	0.4369	0.0004	0.7453	0.0008	1.6881	0.0101	3.5251	0.0261							0.1522	0.0006	0.0758749	0.0577382	1.88003	0.012146	PcoA	0.4371	0.0078	-0.2645	0.0204	-0.4798	0.0123
[truncated: 10 more columns]
